# Supplementary material for: Mast cell chymase reduces the toxicity of Gila monster venom, scorpion venom, and vasoactive intestinal polypeptide in mice
Source: JCI journal article supplement (doi:10.1172/jci46139), 2011-09-19
Supplement: sd1 [file 1]

**Supplemental figures 1-6 for: Mast cell chymase reduces toxicity of Gila monster and scorpion venoms, and VIP, in mice,** by Mitsuteru Akahoshi, Chang Ho Song, Adrian M. Piliponsky, Martin Metz, Andrew Guzzetta, Magnus Åbrink, Susan M. Schlenner, Thorsten B. Feyrerabend, Hans-Reimer Rodewald, Gunnar Pejler, Mindy Tsai, and Stephen J. Galli

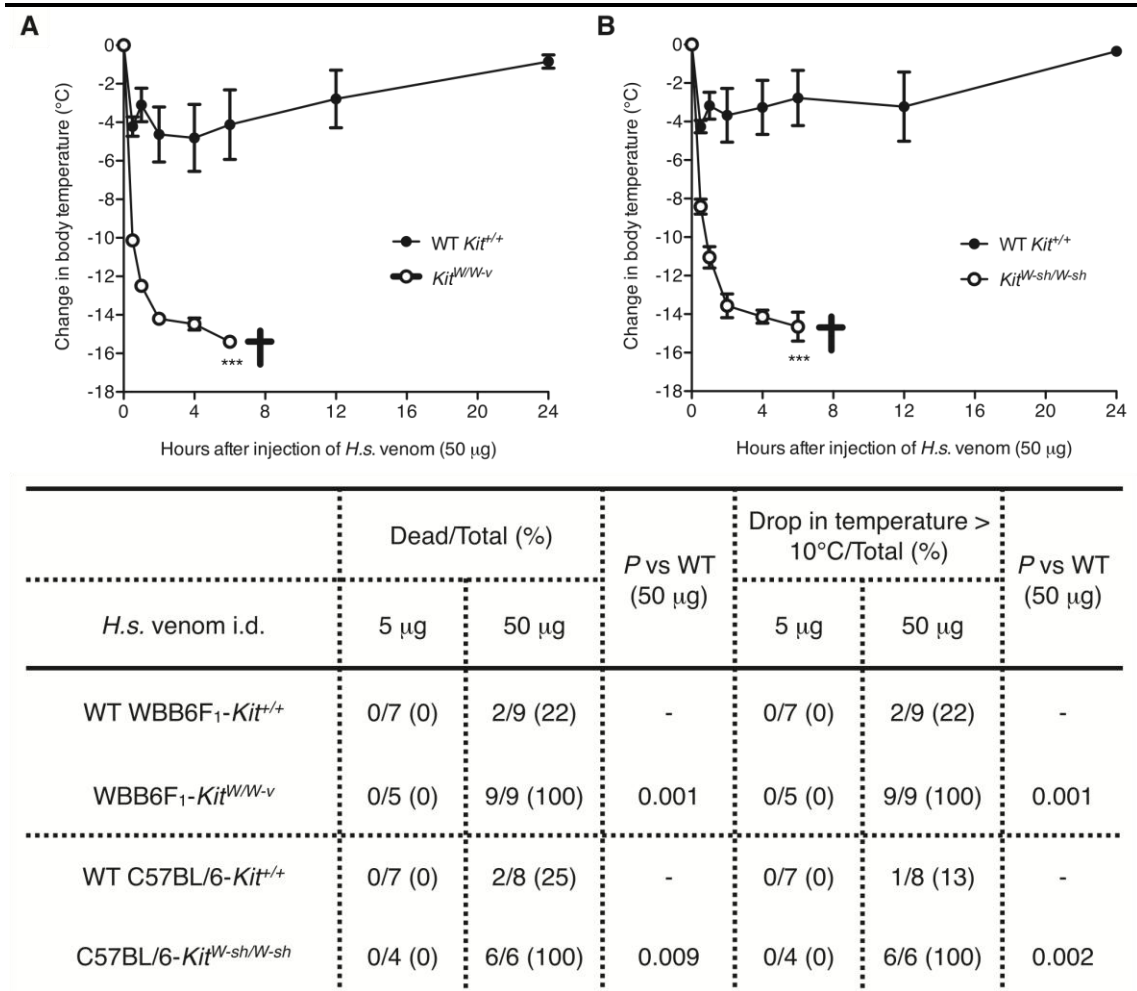

**Supplemental Figure 1**

Changes in rectal temperatures (in degrees C) (A, B), and rates of death and drop in rectal temperature of over 10 degrees within 24 h (Table), after i.d. injection of *H.s.v.* (5 µg [Table] or 50 µg [Table and A, B] in 20 µl DMEM solution) into the ear pinnae (one ear pinna of each mouse) of (A) WT WBB6F1-*Kit*<sup>+/+</sup> mice and mast cell-deficient WBB6F1-*Kit*<sup>W/W-v</sup> mice, and (B) WT C57BL/6-*Kit*<sup>+/+</sup> mice and mast cell-deficient C57BL/6-*Kit*<sup>W-sh/W-sh</sup> mice. \*\*\**P* < 0.001 versus WT *Kit*<sup>+/+</sup> mice injected with 50 µg of *H.s.v.*; † = all mice died.

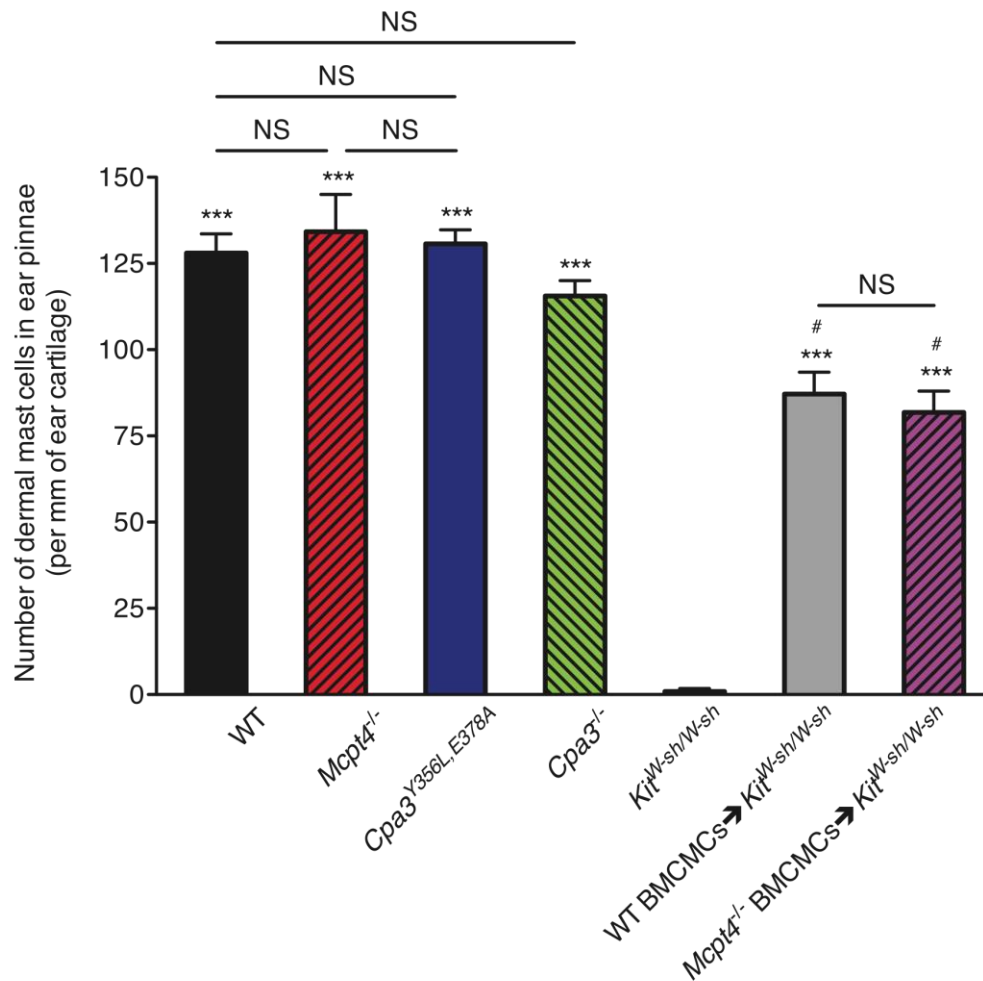

### Supplemental Figure 2

Numbers of mast cells in the dermis of ear pinnae 1 h after injection of vehicle- (DMEM-) in WT C57BL/6 mice, *Mcpt4*<sup>-/-</sup> mice, *Cpa3*<sup>Y356L, E378A</sup> mice, *Cpa3*<sup>-/-</sup> mice, mast cell-deficient C57BL/6-*Kit*<sup>W-sh/W-sh</sup> mice, WT BMCMCs → *Kit*<sup>W-sh/W-sh</sup> mice, and *Mcpt4*<sup>-/-</sup> BMCMCs → *Kit*<sup>W-sh/W-sh</sup> mice (n = 3/group). \*\*\**P* < 0.001 versus C57BL/6-*Kit*<sup>W-sh/W-sh</sup> mice; #*P* < 0.05 versus WT *Kit*<sup>+/+</sup> mice; NS = not significant (*P* > 0.05).

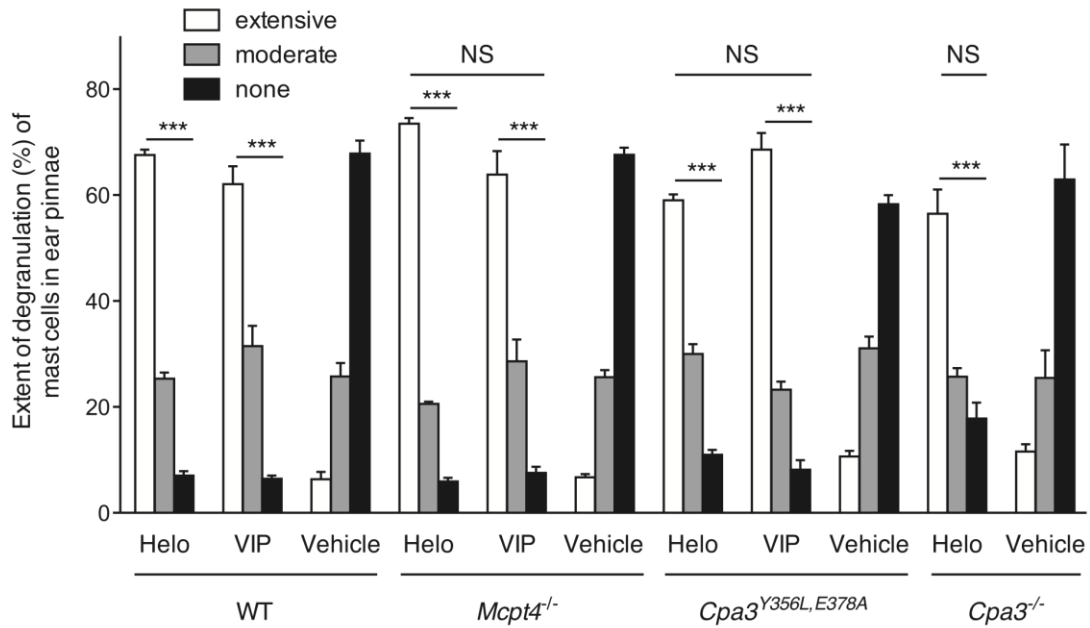

### Supplemental Figure 3

Extent of degranulation of dermal mast cells 1 h after i.d. injection of helodermin (Helo; 5 nmol in 20  $\mu$ l DMEM), VIP (5 nmol in 20  $\mu$ l DMEM) or vehicle (DMEM) alone into a single ear pinna of C57BL/6 WT, *Mcpt4*<sup>-/-</sup>, *Cpa3*<sup>Y356L,E378A</sup>, or *Cpa3*<sup>-/-</sup> mice. \*\*\**P* < 0.001 versus corresponding vehicle-injected groups; NS = not significant (*P* > 0.05) versus corresponding values for WT mice; n = 3/group.

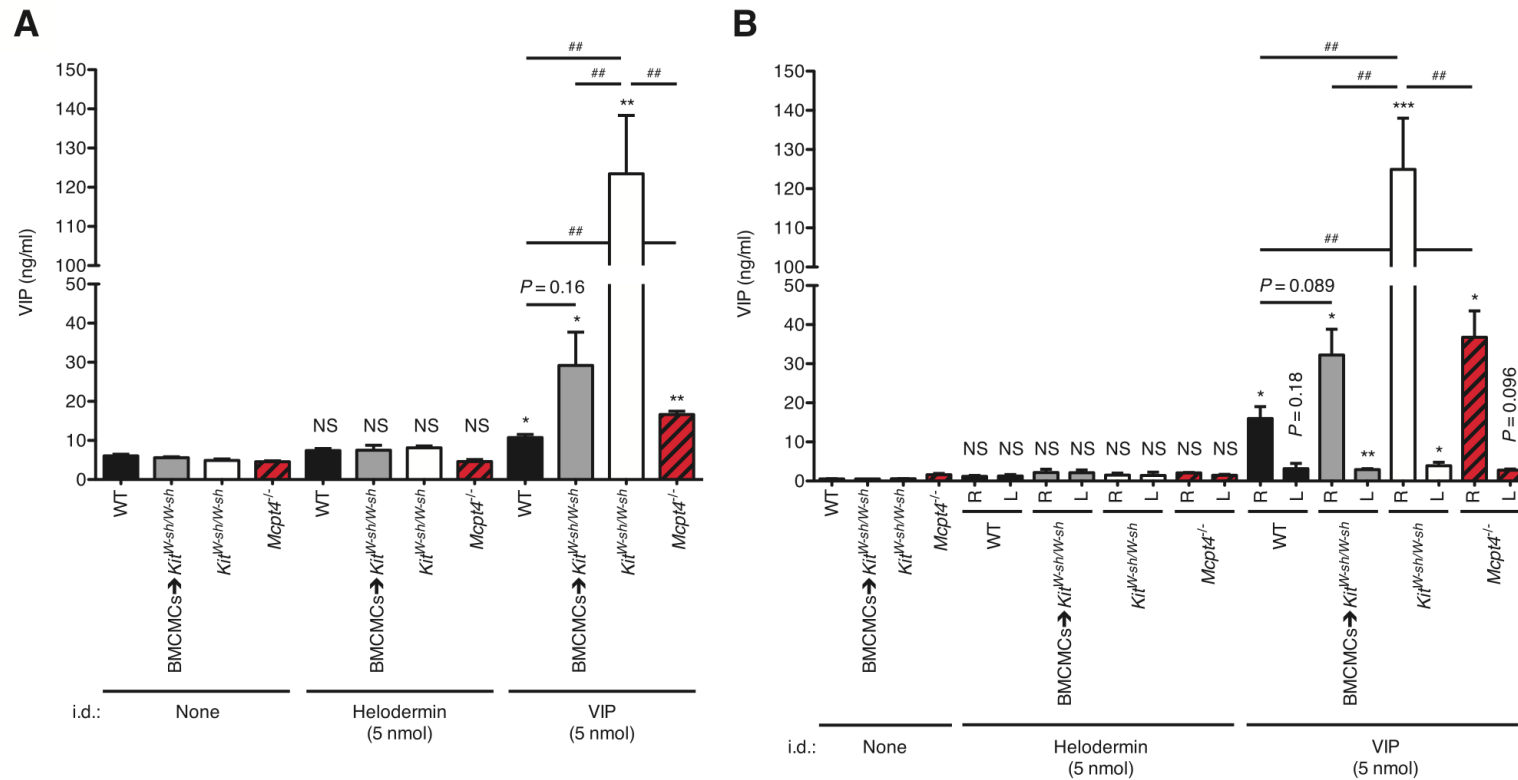

### Supplemental Figure 4

MCPT4 contributes to mast cell-dependent degradation of VIP *in vivo*. Concentrations of VIP in (A) blood and (B) ear pinnae before (i.d.: none) or at 30 min after i.d. injection with 5 nmol of helodermin or VIP into the right ear pinnae of WT, *Kit*<sup>W-sh/W-sh</sup>, WT BMCMCs → *Kit*<sup>W-sh/W-sh</sup>, or *Mcpt4*<sup>-/-</sup> mice. R: right ear (injected with helodermin or VIP); L: left ear (not injected); \**P* < 0.05, \*\**P* < 0.01, \*\*\**P* < 0.001, NS = not significant (*P* > 0.05) versus the corresponding not injected groups; ##*P* < 0.01 for the comparisons shown; n = 3/group, from the 2-3 independent experiments we performed, each of which gave similar results (n = 1-2 mice per group per experiment).

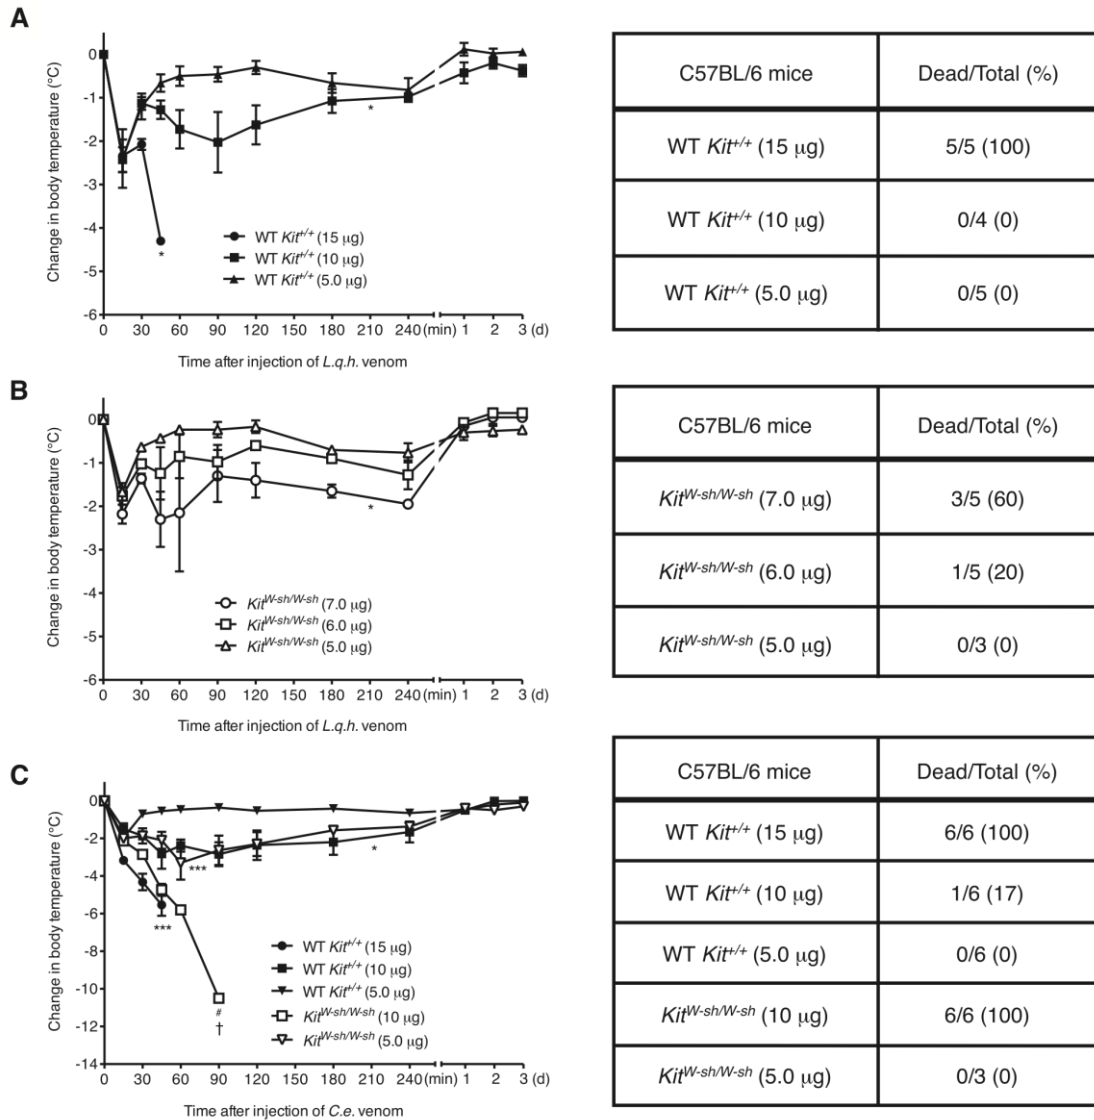

### Supplemental Figure 5

Changes in rectal temperature (in degrees C) and 24 h survival after i.d. injection of different amounts of *Leiurus quinquestriatus hebraeus* venom (*L.q.h.* venom, in 50 µl of PBS) or *Centruroides exilicauda* venom (*C.e.* venom, in 50 µl of PBS) into a single ear pinna of: (A) WT C57BL/6-*Kit*<sup>+/+</sup> mice; (B) mast cell-deficient C57BL/6-*Kit*<sup>W-sh/W-sh</sup> mice; or (C) WT C57BL/6-*Kit*<sup>+/+</sup> mice and mast cell-deficient C57BL/6-*Kit*<sup>W-sh/W-sh</sup> mice. In A and B: \**P* < 0.05 versus corresponding values for mice injected with 5.0 µg of *L.q.h.* venom; in (C): \**P* < 0.05, \*\*\**P* < 0.001 versus WT C57BL/6-*Kit*<sup>+/+</sup> mice injected with 5.0 µg of *C.e.* venom, #*P* < 0.05 versus WT C57BL/6-*Kit*<sup>+/+</sup> mice injected with 10 µg of *C.e.* venom, and †*P* < 0.01 versus mast cell-deficient C57BL/6-*Kit*<sup>W-sh/W-sh</sup> mice injected with 5.0 µg of *C.e.* venom.

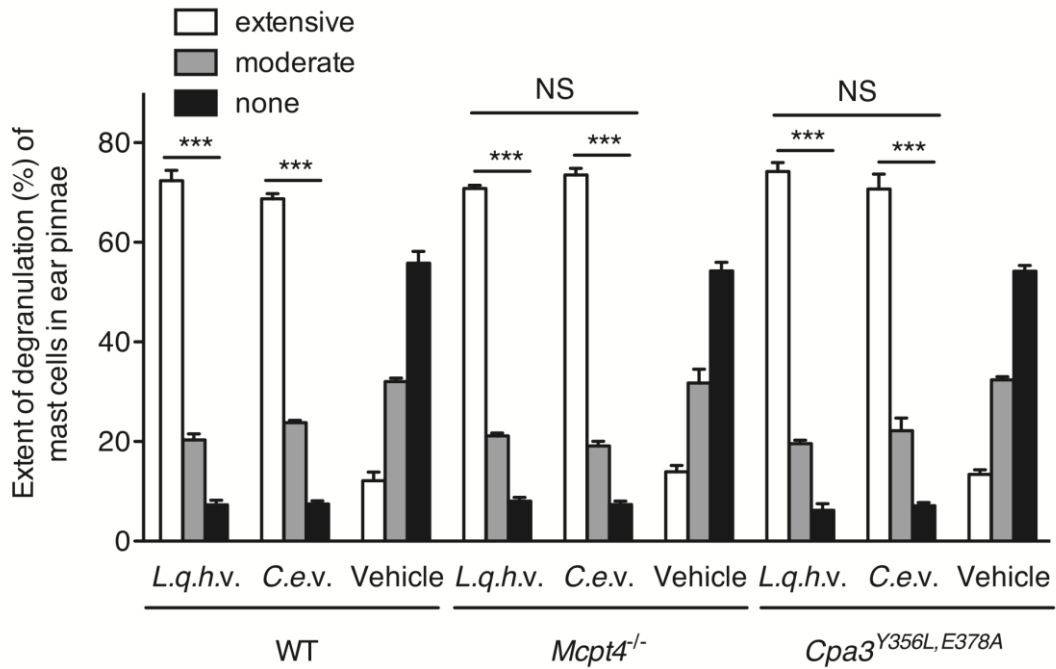

### Supplemental Figure 6

Extent of degranulation of dermal mast cells 1 h after i.d. injection of *L.q.h.v.* (7.5 µg in 50 µl of PBS), *C.e.v.* (7.5 µg in 50 µl of PBS) or vehicle (PBS) alone into a single ear pinna of WT C57BL/6, *Mcpt4*<sup>-/-</sup>, or *Cpa3*<sup>Y356L,E378A</sup> mice. \*\*\**P* < 0.001 versus corresponding vehicle-injected groups; NS = not significant (*P* > 0.05) versus corresponding values for WT mice; n = 3/group.
